# Supplementary material for: Machine learning approaches for large scale classification of produce
Source: PubMed Central journal article supplement (PMC5869718; doi:10.1038/s41598-018-23394-3), 2018-03-27
Supplement: 41598_2018_23394_MOESM1_ESM.pdf [file 41598_2018_23394_MOESM1_ESM.pdf]

# Supplementary Material

## Machine learning approaches for large scale classification of produce

Otkrist Gupta<sup>1,\*</sup>, Anshuman J. Das<sup>1</sup>, Joshua Hellerstein<sup>1</sup>, and Ramesh Raskar<sup>1</sup>

<sup>1</sup>Massachusetts Institute of Technology

\*otkrist@mit.edu

### 1 Confusion matrix for apples (fine grained)

Here we show a sample confusion matrix obtained from taxonomy classification for apples.

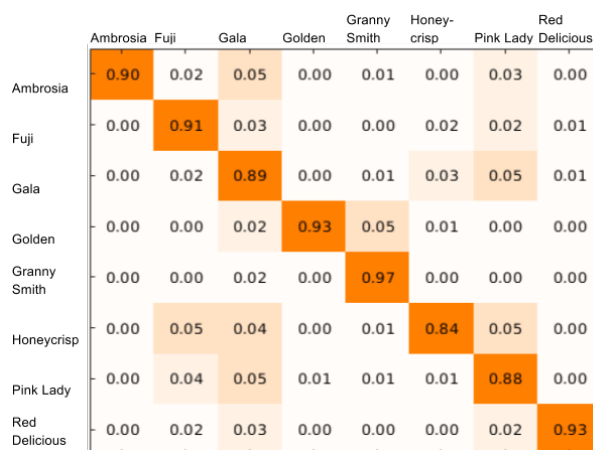

Figure 1: Confusion matrix for apple taxonomy identification. Eight different varieties are selected and analyzed.

## 2 Accuracy with variance for classification

| Taxonomy             | Instrument | Accuracy ( $\pm$ Var) | Cross Validation Accuracy ( $\pm$ Var) |
|----------------------|------------|-----------------------|----------------------------------------|
| Gala Apples          | QEPro      | 96.5 ( $\pm$ 0.357)   | 95.7 ( $\pm$ 0.373)                    |
|                      | Flame NIR  | 65.2 ( $\pm$ 5.77)    | 62.3 ( $\pm$ 11.8)                     |
|                      | Flame      | 81.3 ( $\pm$ 14.9)    | 80.6 ( $\pm$ 9.87)                     |
|                      | NIRQuest   | 98.2 ( $\pm$ 0.512)   | 98.1 ( $\pm$ 0.322)                    |
|                      | Spark      | 95.3 ( $\pm$ 0.699)   | 94.3 ( $\pm$ 0.464)                    |
| Red Delicious Apples | QEPro      | 97.6 ( $\pm$ 0.823)   | 96.8 ( $\pm$ 0.456)                    |
|                      | Flame NIR  | 96.3 ( $\pm$ 0.651)   | 94.7 ( $\pm$ 0.959)                    |
|                      | Flame      | 91.5 ( $\pm$ 2.14)    | 91.3 ( $\pm$ 0.778)                    |
|                      | NIRQuest   | 97.6 ( $\pm$ 0.598)   | 97 ( $\pm$ 0.543)                      |
|                      | Spark      | 97.1 ( $\pm$ 0.863)   | 96.5 ( $\pm$ 0.453)                    |
| Navel Oranges        | QEPro      | 97.1 ( $\pm$ 1.15)    | 96.6 ( $\pm$ 0.861)                    |
|                      | Flame NIR  | 59.4 ( $\pm$ 14.6)    | 71.6 ( $\pm$ 5.7)                      |
|                      | Flame      | 92.6 ( $\pm$ 2.13)    | 92.4 ( $\pm$ 0.815)                    |
|                      | NIRQuest   | 98.7 ( $\pm$ 1.07)    | 97.8 ( $\pm$ 1.22)                     |
|                      | Spark      | 96.7 ( $\pm$ 1.4)     | 96.3 ( $\pm$ 1.03)                     |
| Green Onions         | QEPro      | 98.7 ( $\pm$ 1.05)    | 97.8 ( $\pm$ 0.741)                    |
|                      | Flame NIR  | 92.8 ( $\pm$ 3.07)    | 89.2 ( $\pm$ 2.53)                     |
|                      | Flame      | 94.3 ( $\pm$ 3.07)    | 92.8 ( $\pm$ 1.55)                     |
|                      | NIRQuest   | 98.8 ( $\pm$ 0.885)   | 97.7 ( $\pm$ 0.491)                    |
|                      | Spark      | 97.8 ( $\pm$ 1.41)    | 96.5 ( $\pm$ 1.51)                     |
| Bell Peppers         | QEPro      | 96.1 ( $\pm$ 4.19)    | 95.5 ( $\pm$ 1.55)                     |
|                      | Flame NIR  | 96.2 ( $\pm$ 3.5)     | 94.7 ( $\pm$ 1.9)                      |
|                      | Flame      | 95.7 ( $\pm$ 2.72)    | 95.9 ( $\pm$ 1.44)                     |
|                      | NIRQuest   | 94.8 ( $\pm$ 2.71)    | 95.4 ( $\pm$ 1.66)                     |
|                      | Spark      | 98.9 ( $\pm$ 2.04)    | 99 ( $\pm$ 0.965)                      |

Table 1: Classification accuracy for organic/inorganic classification with each instrument.

| Instrument Name | Minimum (nm) | Maximum (nm) | Feature vector length |
|-----------------|--------------|--------------|-----------------------|
| QEPro           | 406          | 780          | 1005                  |
| Flame NIR       | 1038         | 1542         | 89                    |
| Flame           | 347          | 1013         | 2009                  |
| NIRQuest        | 947          | 2075         | 473                   |
| Spark           | 363          | 697          | 985                   |

Table 2: Feature vector length and span from each instrument (after clipping). We divided data in three separate files for organic/inorganic, taxonomy and farmer classification. We used pca based dimensionality reduction to compress observations and include coefficients from first 100 principal components as feature vectors for further analysis. These feature vectors can be downloaded from this [link](#).

| Taxonomy         | Instrument | Accuracy ( $\pm$ Var) | Cross Validation Accuracy ( $\pm$ Var) |
|------------------|------------|-----------------------|----------------------------------------|
| Fuji Apples      | QEPro      | 99.3 ( $\pm$ 0.392)   | 98.8 ( $\pm$ 0.177)                    |
|                  | Flame NIR  | 80.7 ( $\pm$ 0.759)   | 79.8 ( $\pm$ 1.1)                      |
|                  | Flame      | 94.5 ( $\pm$ 1.12)    | 92.3 ( $\pm$ 1.77)                     |
|                  | NIRQuest   | 97.8 ( $\pm$ 0.713)   | 97.9 ( $\pm$ 0.45)                     |
|                  | Spark      | 95.5 ( $\pm$ 0.779)   | 94.9 ( $\pm$ 0.571)                    |
| Gala Apples      | QEPro      | 99.5 ( $\pm$ 0.471)   | 99 ( $\pm$ 0.314)                      |
|                  | Flame NIR  | 95.5 ( $\pm$ 1.34)    | 95 ( $\pm$ 0.831)                      |
|                  | Flame      | 95.1 ( $\pm$ 1.44)    | 90.6 ( $\pm$ 3.75)                     |
|                  | NIRQuest   | 99.4 ( $\pm$ 0.506)   | 99.3 ( $\pm$ 0.38)                     |
|                  | Spark      | 98.4 ( $\pm$ 1.06)    | 98 ( $\pm$ 0.599)                      |
| Halo Oranges     | QEPro      | 99.6 ( $\pm$ 0.35)    | 99.6 ( $\pm$ 0.108)                    |
|                  | Flame NIR  | 99.7 ( $\pm$ 0.3)     | 99.7 ( $\pm$ 0.168)                    |
|                  | Flame      | 97.4 ( $\pm$ 1.27)    | 96.5 ( $\pm$ 0.651)                    |
|                  | NIRQuest   | 100 ( $\pm$ 0.137)    | 99.8 ( $\pm$ 0.0847)                   |
|                  | Spark      | 99.6 ( $\pm$ 0.503)   | 99.3 ( $\pm$ 0.379)                    |
| Red Bell Peppers | QEPro      | 98.9 ( $\pm$ 0.921)   | 99 ( $\pm$ 0.31)                       |
|                  | Flame NIR  | 98.9 ( $\pm$ 0.842)   | 98.6 ( $\pm$ 0.544)                    |
|                  | Flame      | 93.8 ( $\pm$ 2.73)    | 93.1 ( $\pm$ 1.69)                     |
|                  | NIRQuest   | 99.1 ( $\pm$ 1.5)     | 99.3 ( $\pm$ 0.324)                    |
|                  | Spark      | 99.5 ( $\pm$ 0.623)   | 99.1 ( $\pm$ 0.396)                    |
| Red Potatoes     | QEPro      | 99.3 ( $\pm$ 0.488)   | 99.1 ( $\pm$ 0.282)                    |
|                  | Flame NIR  | 94.9 ( $\pm$ 5.45)    | 94.1 ( $\pm$ 4.44)                     |
|                  | Flame      | 98.6 ( $\pm$ 0.889)   | 98.1 ( $\pm$ 0.482)                    |
|                  | NIRQuest   | 99.4 ( $\pm$ 0.307)   | 99.4 ( $\pm$ 0.292)                    |
|                  | Spark      | 99.3 ( $\pm$ 0.232)   | 99.4 ( $\pm$ 0.202)                    |
| Russet Potatoes  | QEPro      | 99.9 ( $\pm$ 0.153)   | 99.8 ( $\pm$ 0.16)                     |
|                  | Flame NIR  | 85.6 ( $\pm$ 13.4)    | 81.5 ( $\pm$ 14.1)                     |
|                  | Flame      | 99.5 ( $\pm$ 0.348)   | 99.3 ( $\pm$ 0.273)                    |
|                  | NIRQuest   | 99.8 ( $\pm$ 0.27)    | 99.6 ( $\pm$ 0.147)                    |
|                  | Spark      | 99.9 ( $\pm$ 0.15)    | 99.8 ( $\pm$ 0.142)                    |
| Steak Tomatoes   | QEPro      | 98.5 ( $\pm$ 0.798)   | 97.8 ( $\pm$ 0.599)                    |
|                  | Flame NIR  | 95.6 ( $\pm$ 1.29)    | 95.7 ( $\pm$ 0.994)                    |
|                  | Flame      | 85.7 ( $\pm$ 11.7)    | 90.1 ( $\pm$ 2.83)                     |
|                  | NIRQuest   | 99.1 ( $\pm$ 0.454)   | 99.2 ( $\pm$ 0.432)                    |
|                  | Spark      | 98.2 ( $\pm$ 1.12)    | 98 ( $\pm$ 0.427)                      |

Table 3: Classification accuracy with instrument for farmer classification.

| Taxonomy     | Instrument | Accuracy ( $\pm$ Var) | Cross Validation Accuracy ( $\pm$ Var) |
|--------------|------------|-----------------------|----------------------------------------|
| Apples       | QEPro      | 90.8 ( $\pm$ 0.486)   | 90.2 ( $\pm$ 0.24)                     |
|              | Flame NIR  | 51 ( $\pm$ 2.62)      | 54.1 ( $\pm$ 2.29)                     |
|              | Flame      | 78.3 ( $\pm$ 2.16)    | 76.9 ( $\pm$ 1.68)                     |
|              | NIRQuest   | 91.2 ( $\pm$ 0.405)   | 90.3 ( $\pm$ 0.201)                    |
|              | Spark      | 89.9 ( $\pm$ 0.461)   | 88.7 ( $\pm$ 0.195)                    |
| Strawberries | QEPro      | 86.7 ( $\pm$ 1.86)    | 83.4 ( $\pm$ 1.13)                     |
|              | Flame NIR  | 74.5 ( $\pm$ 3.45)    | 75.4 ( $\pm$ 2.22)                     |
|              | Flame      | 84.6 ( $\pm$ 1.85)    | 83.3 ( $\pm$ 1.84)                     |
|              | NIRQuest   | 92.9 ( $\pm$ 1.62)    | 91.6 ( $\pm$ 0.876)                    |
|              | Spark      | 87.8 ( $\pm$ 2.52)    | 87.1 ( $\pm$ 0.857)                    |
| Grapes       | QEPro      | 95.6 ( $\pm$ 1.11)    | 95.6 ( $\pm$ 0.4)                      |
|              | Flame NIR  | 24.6 ( $\pm$ 4.79)    | 75.6 ( $\pm$ 7.9)                      |
|              | Flame      | 88.4 ( $\pm$ 1.5)     | 87.7 ( $\pm$ 1.66)                     |
|              | NIRQuest   | 91.1 ( $\pm$ 1.41)    | 90 ( $\pm$ 1.08)                       |
|              | Spark      | 95.6 ( $\pm$ 0.716)   | 95.4 ( $\pm$ 1.03)                     |
| Oranges      | QEPro      | 98.5 ( $\pm$ 0.336)   | 97.9 ( $\pm$ 0.311)                    |
|              | Flame NIR  | 90 ( $\pm$ 1.04)      | 89 ( $\pm$ 0.885)                      |
|              | Flame      | 91.9 ( $\pm$ 0.907)   | 91.4 ( $\pm$ 0.553)                    |
|              | NIRQuest   | 98.1 ( $\pm$ 0.425)   | 97.7 ( $\pm$ 0.203)                    |
|              | Spark      | 98 ( $\pm$ 0.361)     | 97.5 ( $\pm$ 0.325)                    |
| Mushrooms    | QEPro      | 96.5 ( $\pm$ 0.878)   | 95.6 ( $\pm$ 0.672)                    |
|              | Flame NIR  | 84.6 ( $\pm$ 2.68)    | 83.4 ( $\pm$ 1.11)                     |
|              | Flame      | 85.9 ( $\pm$ 1.25)    | 82.8 ( $\pm$ 0.726)                    |
|              | NIRQuest   | 93.8 ( $\pm$ 1.42)    | 92.7 ( $\pm$ 0.406)                    |
|              | Spark      | 94.9 ( $\pm$ 0.886)   | 93.9 ( $\pm$ 0.848)                    |
| Onions       | QEPro      | 97.4 ( $\pm$ 0.493)   | 96.7 ( $\pm$ 0.412)                    |
|              | Flame NIR  | 64.6 ( $\pm$ 1.33)    | 63.3 ( $\pm$ 1.37)                     |
|              | Flame      | 92.6 ( $\pm$ 0.983)   | 91.8 ( $\pm$ 0.389)                    |
|              | NIRQuest   | 90.7 ( $\pm$ 0.942)   | 88.6 ( $\pm$ 0.55)                     |
|              | Spark      | 96.9 ( $\pm$ 0.989)   | 97 ( $\pm$ 0.351)                      |
| Bell Peppers | QEPro      | 96.9 ( $\pm$ 0.522)   | 96.3 ( $\pm$ 0.381)                    |
|              | Flame NIR  | 83.5 ( $\pm$ 1.36)    | 81.8 ( $\pm$ 0.754)                    |
|              | Flame      | 88.2 ( $\pm$ 1.91)    | 87.9 ( $\pm$ 0.985)                    |
|              | NIRQuest   | 95 ( $\pm$ 0.688)     | 93.9 ( $\pm$ 0.762)                    |
|              | Spark      | 97.1 ( $\pm$ 0.697)   | 97.3 ( $\pm$ 0.302)                    |

Table 4: Accuracy by instrument for taxonomic identification.

### 3 Analysis of model selection

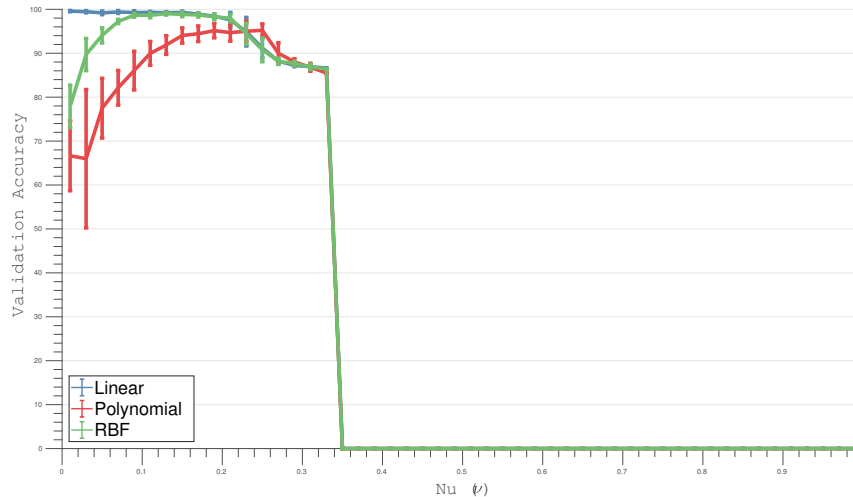

(a) Model selection for farmer classification over halo oranges.

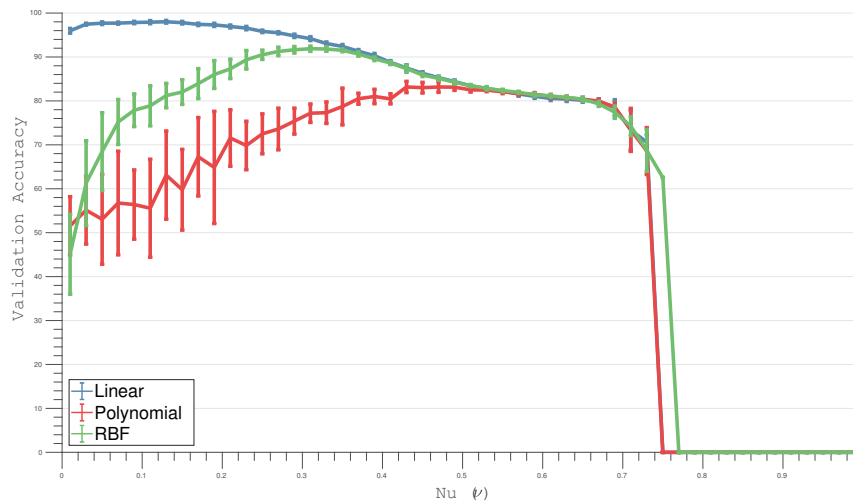

(b) Model selection for organic classification of gala apples.

Figure 2: Model selection with hyperparameter  $\nu$  in SVM implementation. Accuracy can greatly vary by hyperparameters including  $\nu$  and  $t$ . We perform a grid search to search for best performing value of both  $\nu$  and  $t$ .

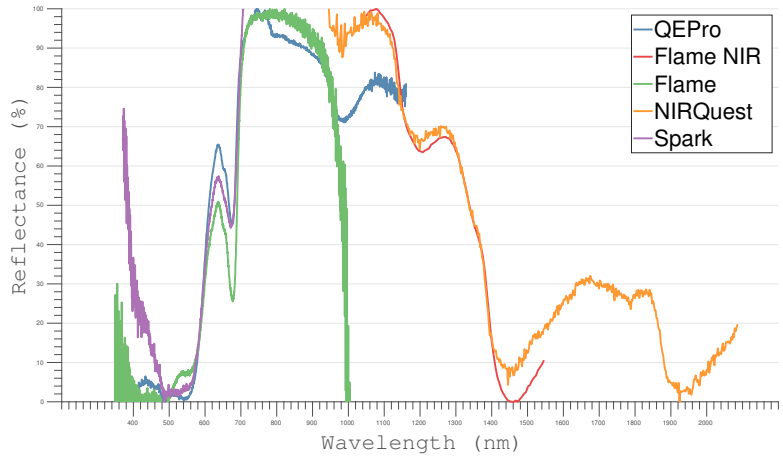

Figure 3: Recorded measurements from multiple instruments for a single Fuji apple sample. Different colors represent measurements from different recording instruments. While instruments agree on most variations, there are differences originating from calibration error in each instrument.

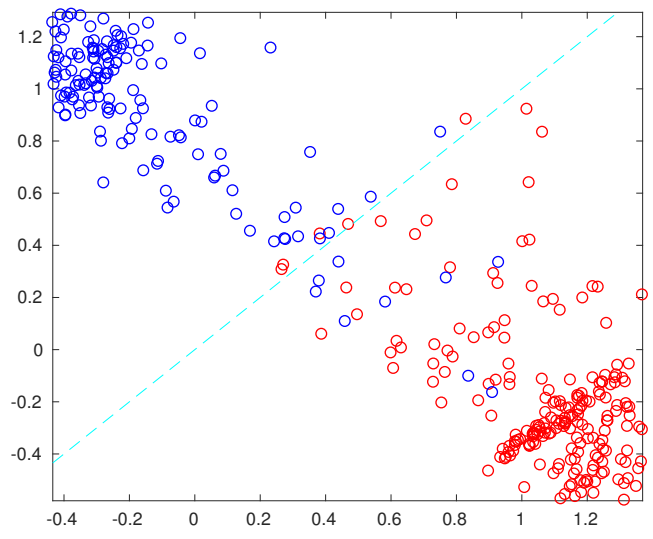

Figure 4: Separating hyperplane for organic and inorganic classification for Fuji apples. Red marks organic samples, blue marks inorganic samples, and the dashed line represents the separating hyperplane.
